# Supplementary material for: Joint Effects of Calcium Carbonate in Domestic Water and the Genetic Risk on Rheumatoid Arthritis
Source: Research Square preprint supplement (doi:10.21203/rs.3.rs-5871734/v1), 2025-01-23
Supplement: Supplementary file 1 [file 0c1b6831988d651223e6affb.docx]

**Supplementary files**

Supplement Table 1. Information of the variables in this study.

| Field ID in UKB | Description | Processing |
| --- | --- | --- |
| 131850 | Date of the first occurrence of any code mapped to 3-character ICD10 M06 (rheumatoid arthritis but except seropositive rheumatoid arthritis) | ‘1900-01-01’, ‘1901-01-01’, ‘1902-02-02’, ‘1903-03-03’, 1909-09-09’, and ‘2037-07-07’ was removed. |
| 131852 | Source of report of rheumatoid arthritis. | - |
| 53 | Date when a participant attended a UK Biobank assessment centre. | - |
| 21003 | Age when attended assessment centre | - |
| 31 | Sex |  |
| 21100 | United States Geological Survey classification of CaCO3 concentration into four groups: soft water (0-60 mg/L), moderately hard water (60-120 mg/L), hard water (120-180 mg/L) and very hard water (> 180 mg/L). | - |
| 21103 | Domestic water calcium carbonate concentration. | - |
| 21104 | Domestic water calcium concentration. | - |
| 21105 | Domestic water magnesium concentration. | - |
| 1289 | On average, the heaped tablespoons of cooked vegetables intake per day. | -10 represents “Less than one” was recoded as 0; -1 and -3 represents “Do not know” and “Prefer not to answer” were recoded as NA. |
| 1299 | On average, the heaped tablespoons of salad/raw vegetable intake per day. | -10 represents “Less than one” was recoded as 0; -1 and -3 represents “Do not know” and “Prefer not to answer” were recoded as NA. |
| 1309 | The pieces of fresh fruit intake per day. | -10 represents “Less than one” was recoded as 0; -1 and -3 represents “Do not know” and “Prefer not to answer” were recoded as NA. |
| 1319 | The pieces of dried fruit intake per day. | -10 represents “Less than one” was recoded as 0; -1 and -3 represents “Do not know” and “Prefer not to answer” were recoded as NA. |
| 1329 | Times of oil fish intake in a week. | -1 and -3 represents “Do not know” and “Prefer not to answer” were recoded as NA. |
| 1339 | Times of non-oily fish intake in a week. | -1 and -3 represents “Do not know” and “Prefer not to answer” were recoded as NA. |
| 1349 | Times of processed meats (such as bacon, ham, sausages, meat pies, kebabs, burgers, chicken nuggets) intake | -1 and -3 represents “Do not know” and “Prefer not to answer” were recoded as NA. |
| 1359 | Times of poultry intake (such aschicken, turkey or other poultry) | -1 and -3 represents “Do not know” and “Prefer not to answer” were recoded as NA. |
| 1369 | Times of beef intake. | -1 and -3 represents “Do not know” and “Prefer not to answer” were recoded as NA. |
| 1389 | Times of pork intake. | -1 and -3 represents “Do not know” and “Prefer not to answer” were recoded as NA. |
| 1408 | Times of cheese intake | -1 and -3 represents “Do not know” and “Prefer not to answer” were recoded as NA. |
| 1458 | Times of cereal intake | -1 and -3 represents “Do not know” and “Prefer not to answer” were recoded as NA. |
| 1528 | Glasses of water drink each day | -10 represents “Less than one” was recoded as 0; -1 and -3 represents “Do not know” and “Prefer not to answer” were recoded as NA. |
| 20116 | Current/past/never smoking status | -3 represents “Prefer not to answer” was recoded as NA. |
| 20117 | Current/past/never alcohol drinking status | -3 represents “Prefer not to answer” was recoded as NA. |
| 864 | In a typical week, days walk for at least 10 minutes at a time. | -1 represents “Do not know”, -2 represents “unable to walk”, and “-3” represents “not answer” was recoded as NA. |
| 884 | In a typical week, days do 10 minutes or more of moderate physical activities like carrying light loads, cycling at normal pace. | -1 and -3 were recoded as NA. |
| 904 | In a typical week, days do 10 minutes or more of vigorous physical activities(These are activities that make you sweat or breathe hard such as fast cycling, aerobics, heavy lifting). | -1 and -3 were recoded as NA. |
| 943 | At home, during the last 4 weeks, times a day climb a flight of stairs. | -1 and -3 were recoded as NA. |
| 1070 | In a typical day, hours spend watching TV. | -10 was recoded as 0; -1 and -3 were recoded as NA. |
| 1080 | In a typical day, hours spend using computer. | -10 was recoded as 0; -1 and -3 were recoded as NA. |
| 1090 | In a typical day, hours spend driving. | -10 was recoded as 0; -1 and -3 were recoded as NA. |
| 6164 | In the last 4 weeks, did you spend any time doing the following: walking for pleasure (not as means of transport), other exercises (swimming, cycling, keep fit, bowling), strenuous sports, light DIY (pruning, watering the lawn), heavey IDY (weeding, lawn mowing, carpentry, digging). | -7 represents “non of the above” was recoded as 0. -3 represents “prefer not to answer” was recoded as NA. |
| 46 and 47 | 46: left hand grip; 47: right hand grip. | The mean of left and right hand grip was calculated. |
| 93 and 4080 | 93: Systolic blood pressure, manual reading. 4080:Systolic blood pressure, automated reading. | The results from manual reading and automated reading were merged. |
| 94 and 4079 | 94: Diastolic blood pressure, manual reading. 4079: Diastolic blood pressure, automated reading. | The results from manual reading and automated reading were merged. |
| 95 | Pause rate during blood-pressure measurement. | - |
| 23105 | Basal metabolic rate estimation by impedance measurement. | - |
| 23099 | Body fat percentage estimation by impedance measurement. | - |
| 22000 | Genotype measurement batch | - |
| 22009 | Score for each principal component 1-40. | - |

Supplement table 2. Information of the SNP used to calculated the PRS.

| Rs.ID | Gene name | Gene function | Beta | SE | P |
| --- | --- | --- | --- | --- | --- |
| rs2258734 | TTC34 |  | -0.09 | 0.01 | 9.55e-19 |
| rs2076616 | ARHGEF10L |  | -0.08 | 0.01 | 1.16e-12 |
| esv3585367 | PADI4 | calcium ion binding, calcium, innate immune response | -0.12 | 0.01 | 1.34e-29 |
| rs2306627 | INPP5B |  | 0.07 | 0.01 | 4.76e-10 |
| rs2317231 | FCRL3 | regulation of calcium ion import, immune response | 0.06 | 0.01 | 4.55e-11 |
| rs55963299 | PUS10 |  | 0.09 | 0.01 | 1.63e-12 |
| rs12712065 | AFF3 |  | -0.1 | 0.01 | 7.58e-25 |
| rs2192008 | NAB1 |  | -0.06 | 0.01 | 2.59e-09 |
| rs2141331 | CASP8 | regulation of innate immune response | 0.11 | 0.02 | 2.45e-08 |
| rs3087243 | CTLA4 | regulation of innate immune response | -0.12 | 0.01 | 2.03e-29 |
| rs5019428 | PLCL2 | release of sequestered calcium ion into cytosol, B cell proliferation involved in immune response | 0.07 | 0.01 | 4.46e-11 |
| rs7731626 | ANKRD55 |  | -0.19 | 0.01 | 2.27e-44 |
| rs187579 | GIN1 |  | -0.08 | 0.01 | 5.67e-10 |
| rs12519914 | LINC01843 |  | 0.08 | 0.01 | 5.14e-10 |
| rs11420145 | ETV7 |  | 0.08 | 0.01 | 5.19e-09 |
| rs28362855 | TCTE1 |  | 0.18 | 0.02 | 1.84e-24 |
| rs3093017 | CCR6 | calcium iron concentration,calcium-mediatd signaling,immune response, immune response | -0.13 | 0.01 | 4.6e-42 |
| rs3757387 | IRF5 | immune system process, positive regulation of cytokine production involved in immune response, innate immune response | 0.11 | 0.01 | 1.43e-23 |
| rs12531711 | RP11-309L24.10 |  | 0.16 | 0.02 | 8.86e-18 |
| rs2736340 | RP11-148O21.4 |  | 0.11 | 0.01 | 2.39e-22 |
| rs1953126 | TRAF1 |  | -0.07 | 0.01 | 3.39e-10 |
| rs479777 | AP003774.1 |  | -0.07 | 0.01 | 5.15e-10 |
| rs73005423 | DDX6 |  | -0.08 | 0.01 | 6.61e-11 |
| rs1427749 | ARID2 |  | -0.08 | 0.01 | 4.91e-08 |
| rs705700 | SUOX |  | 0.07 | 0.01 | 5.58e-10 |
| rs9532434 | COG6 |  | 0.09 | 0.01 | 3.44e-16 |
| rs1885013 | TMEM229B |  | -0.08 | 0.01 | 1.29e-09 |
| rs10152591 | TLE3 |  | -0.16 | 0.02 | 2.18e-13 |
| rs34480360 | CCDC189 |  | 0.07 | 0.01 | 8.67e-09 |
| rs56750287 | ORMDL3 |  | 0.07 | 0.01 | 1.98e-11 |
| rs12720356 | ZGLP1 |  | -0.14 | 0.02 | 8.07e-09 |
| rs28373672 | IGFLR1 |  | -0.07 | 0.01 | 3.33e-08 |
| rs1883832 | SLC12A5 |  | -0.08 | 0.01 | 1.45e-13 |
| rs2300373 | DONSON |  | -0.07 | 0.01 | 4.72e-08 |
| rs79818725 | RCAN1 | calcium-mediated signaling, calcium-dependent protein serine/threonine phosphatase regulator activity | -0.1 | 0.02 | 3.67e-08 |
| rs5754100 | CCDC116 |  | 0.07 | 0.01 | 1.78e-10 |
| rs2069235 | SYNGR1 |  | 0.11 | 0.01 | 1.59e-20 |

Supplement Table 3. Sources of information of 5880 rheumatoid arthritis in the main analysis

|  | Death registries | Primary care | Hospital admission | Self-reported |
| --- | --- | --- | --- | --- |
| Number of cases | 10 | 356 | 5198 | 316 |

Notes: Rheumatoid arthritis cases were detected using the algorithmically-defined outcomes (ADOs) developed by the UK Biobank Outcome Adjudication group. The ADOs identify the earliest recorded date of a given health outcome by bombinating coded information from UK Biobank’s data collection including data from participants on their self-reported medical conditions, operations and medications, along with linked data from hospital admissions (diagnoses and procedures) and death registries. The ICD9 or ICD10 was used to define an rheumatoid arthritis.

Supplement Table 4. Hazard ratio of the variables in this study.

| Characteristics | HR | Low 95% CI | Up 95% CI | P value |
| --- | --- | --- | --- | --- |
| Water hardness |  |  |  |  |
| Soft water | 1.0000 | 1.0000 | 1.0000 |  |
| Moderately hard water | 1.0429 | 0.9762 | 1.1142 | 0.212675915 |
| Hard water | 0.8555 | 0.7615 | 0.9611 | 0.008592486 |
| Very hard water | 0.8517 | 0.7982 | 0.9089 | 1.28E-06 |
| Sex |  |  |  |  |
| Female | 1.0000 | 1.0000 | 1.0000 |  |
| Male | 0.9146 | 0.8053 | 1.0387 | 0.169257968 |
| PRS | 1.2731 | 1.2412 | 1.3059 | 1.61E-77 |
| Age | 1.0356 | 1.0312 | 1.0401 | 2.61E-58 |
| Cooked vegetable | 1.0075 | 0.9937 | 1.0214 | 0.290528368 |
| Raw vegetable | 1.0004 | 0.9874 | 1.0135 | 0.955658549 |
| Fresh fruit | 1.0016 | 0.9852 | 1.0183 | 0.848511324 |
| Dried fruit | 1.0071 | 0.9936 | 1.0208 | 0.30177266 |
| Oily fish | 0.9648 | 0.9357 | 0.9947 | 0.021506645 |
| Non oily fish | 1.0242 | 0.9885 | 1.0613 | 0.186744997 |
| Processed meat | 0.9683 | 0.9417 | 0.9956 | 0.02336499 |
| Poultry | 1.0150 | 0.9839 | 1.0471 | 0.347514866 |
| Beef | 0.9926 | 0.9600 | 1.0264 | 0.665198469 |
| Pork | 1.0096 | 0.9715 | 1.0492 | 0.627212023 |
| Cheese | 0.9579 | 0.9350 | 0.9813 | 0.00047943 |
| Cereal | 0.9906 | 0.9810 | 1.0003 | 0.058510459 |
| Water intake | 1.0143 | 1.0025 | 1.0263 | 0.017476059 |
| Smoking status |  |  |  |  |
| Never smoking | 1.0000 | 1.0000 | 1.0000 |  |
| Previous smoking | 1.3548 | 1.2797 | 1.4344 | 1.71E-25 |
| Current smoking | 1.6672 | 1.5349 | 1.8109 | 8.72E-34 |
| Alcohol status |  |  |  |  |
| Never | 1.0000 | 1.0000 | 1.0000 |  |
| Previous | 0.9909 | 0.8512 | 1.1535 | 0.905959624 |
| Current | 0.8089 | 0.7241 | 0.9037 | 0.000174949 |
| Walked more than 10 minutes | 1.0193 | 1.0043 | 1.0345 | 0.011283415 |
| Moderate physical activity | 1.0146 | 1.0017 | 1.0278 | 0.026323276 |
| Vigorous physical activity | 0.9931 | 0.9782 | 1.0081 | 0.363116125 |
| Stair climbing | 0.9464 | 0.9273 | 0.9658 | 1.09E-07 |
| Time wating TV | 1.0574 | 1.0422 | 1.0728 | 4.39E-14 |
| Time using computer | 0.9925 | 0.9747 | 1.0105 | 0.410739919 |
| Time driving | 1.0084 | 0.9893 | 1.0279 | 0.39127723 |
| Types of physicalactivity | 1.0255 | 1.0000 | 1.0516 | 0.049696664 |
| Hand grip | 0.9528 | 0.9492 | 0.9564 | 3.69E-138 |
| SBP | 1.0000 | 0.9980 | 1.0020 | 0.974479853 |
| DBP | 0.9956 | 0.9919 | 0.9994 | 0.022614121 |
| Pause rate | 1.0070 | 1.0046 | 1.0094 | 5.30E-09 |
| Metabolic rate | 1.0119 | 1.0069 | 1.0169 | 2.48E-06 |
| Body fat percentage | 1.0002 | 1.0002 | 1.0002 | 1.01E-33 |
| Genotyping batch | 0.9994 | 0.9986 | 1.0003 | 0.188486561 |
| Genetic PCA1 | 1.0011 | 1.0007 | 1.0016 | 2.45E-06 |
| Genetic PCA2 | 1.0000 | 0.9990 | 1.0011 | 0.941968951 |
| Genetic PCA3 | 1.0027 | 1.0008 | 1.0047 | 0.00571383 |
| Genetic PCA4 | 1.0017 | 0.9990 | 1.0044 | 0.216388764 |
| Genetic PCA5 | 0.9915 | 0.9879 | 0.9950 | 2.22E-06 |
| Genetic PCA6 | 1.0021 | 0.9970 | 1.0071 | 0.417783586 |
| Genetic PCA7 | 0.9998 | 0.9943 | 1.0053 | 0.929843535 |
| Genetic PCA8 | 0.9987 | 0.9932 | 1.0042 | 0.649239406 |
| Genetic PCA9 | 1.0049 | 0.9988 | 1.0110 | 0.114087488 |
| Genetic PCA10 | 1.0022 | 0.9962 | 1.0082 | 0.479860209 |

Supplement figure 1. Adjusted hazard ratios and 95% confidence interval for multi-variables with risk of rheumatoid arthritis, after excluding participants with follow-up time less than 2 years in the sensitivity analysis (N=434469).


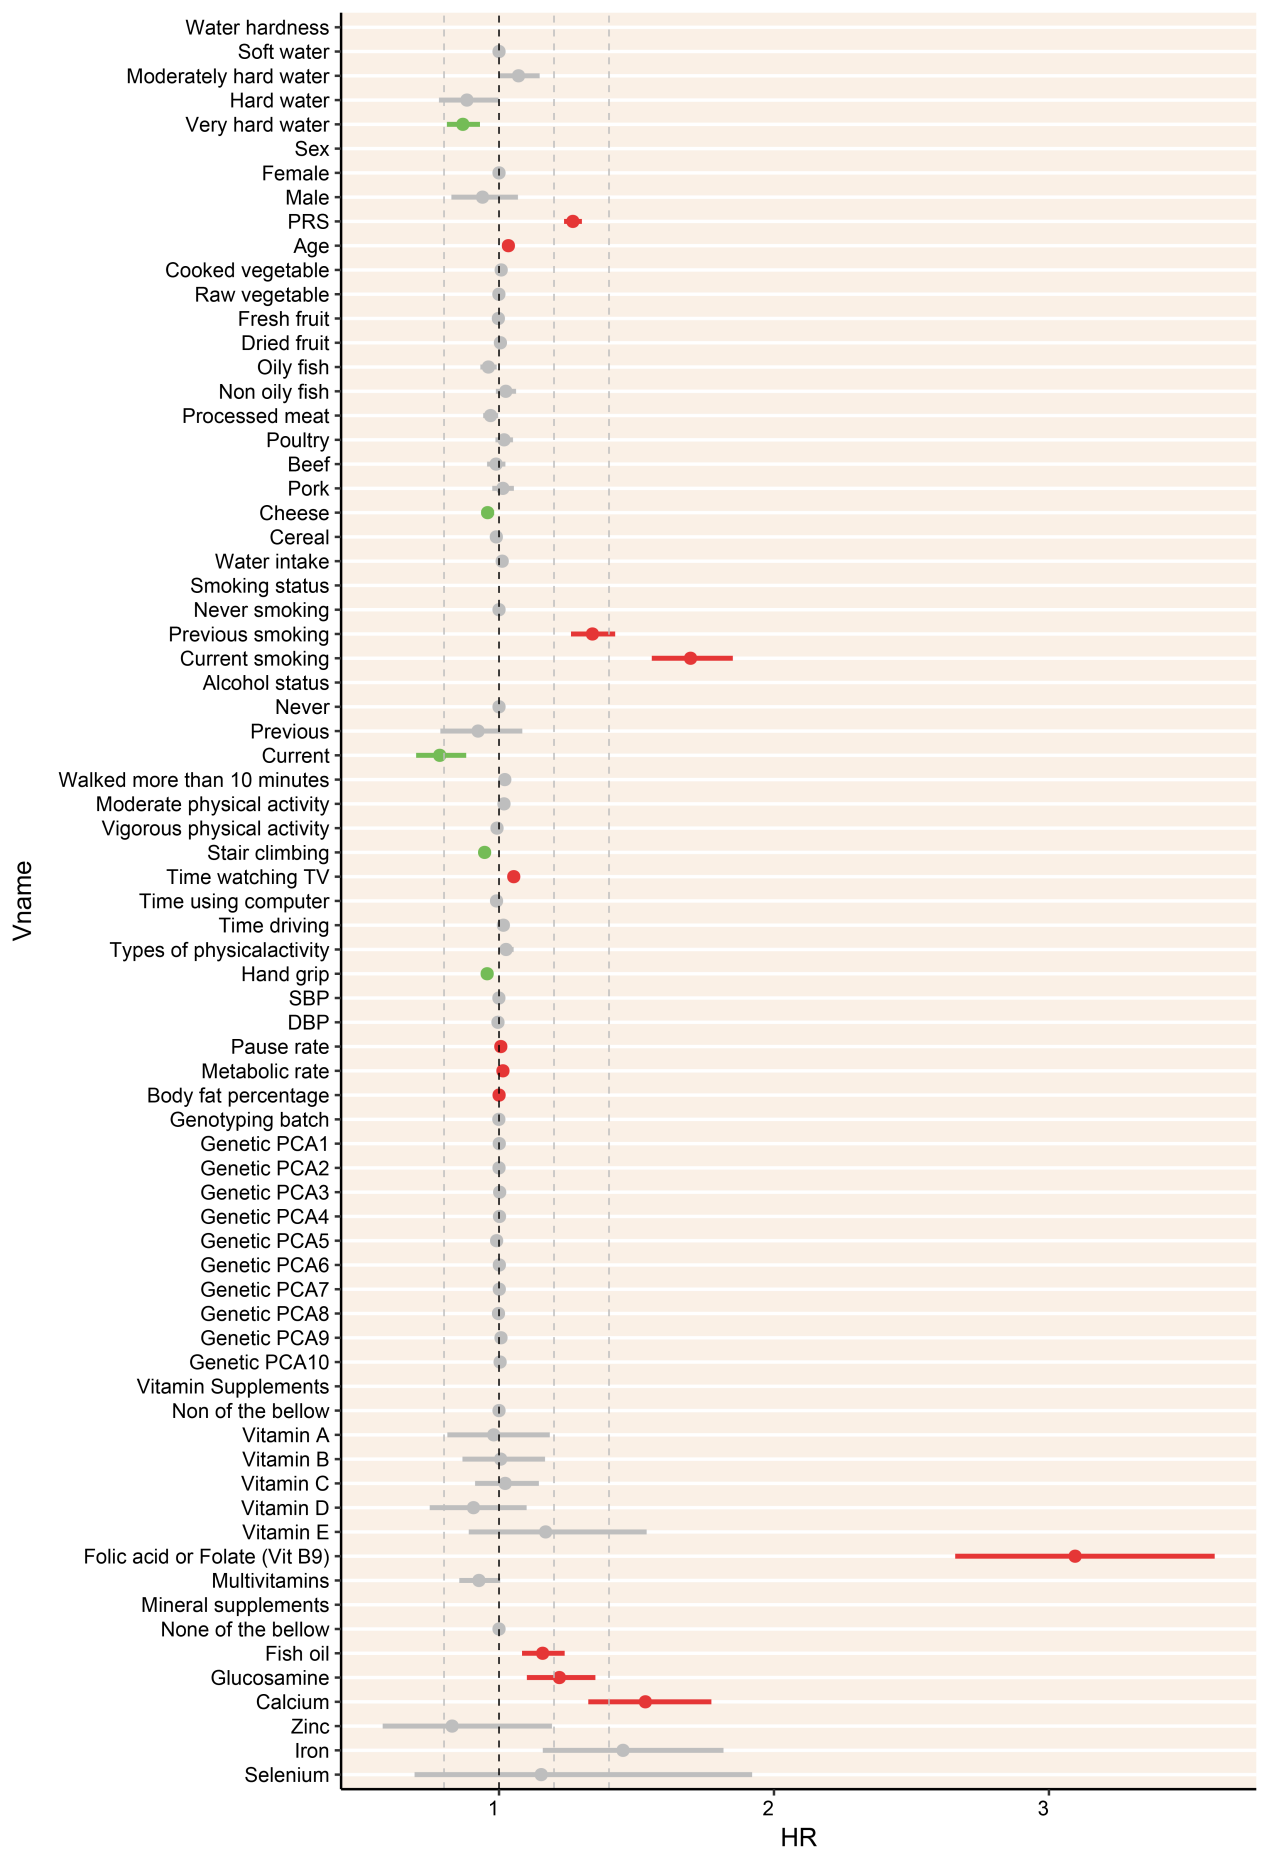


Supplement figure 2. Adjusted hazard ratios and 95% confidence interval for multi-variables with the risk of rheumatoid arthritis after limiting participants living in the current address for at least five years in the sensitivity analysis (N=).


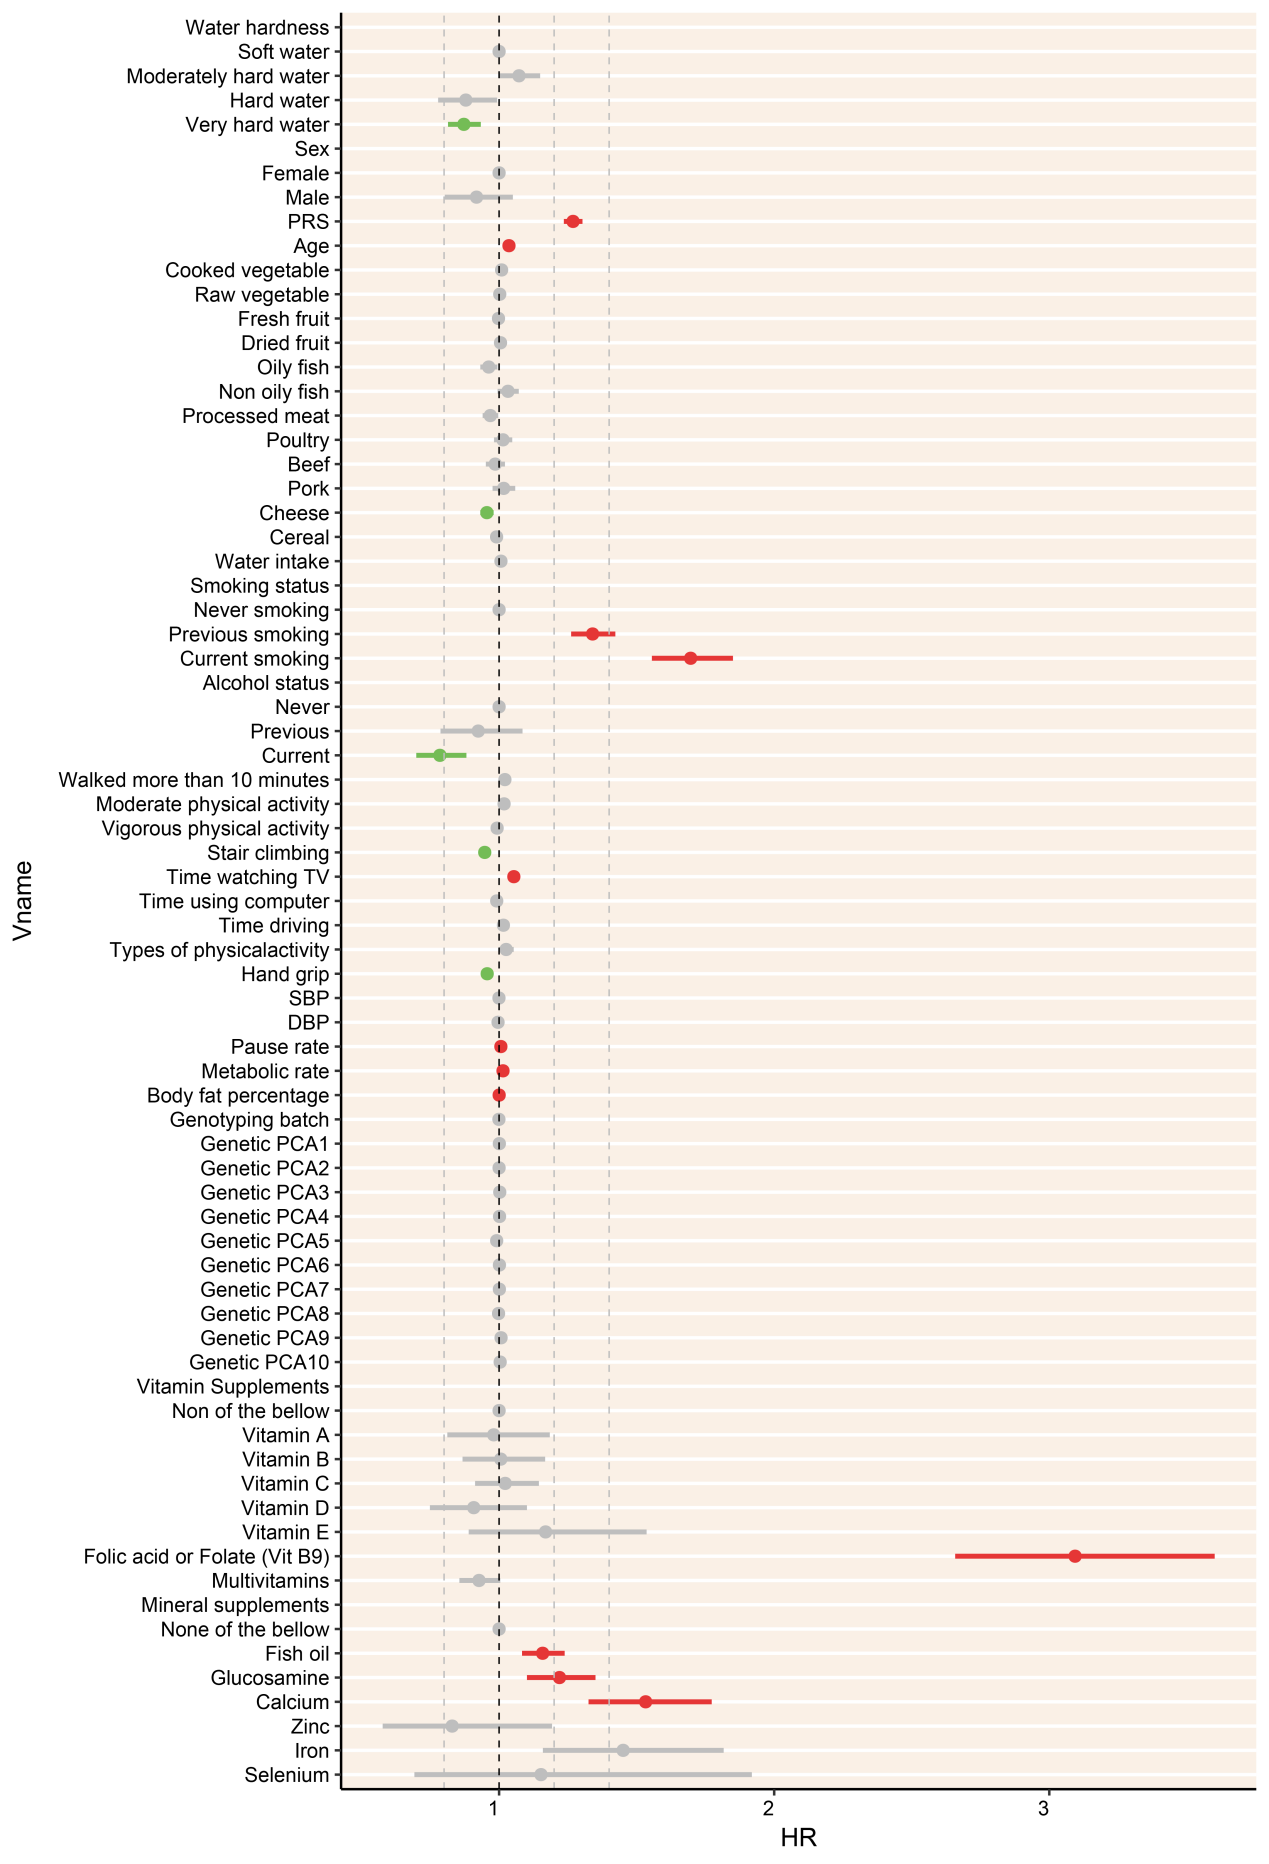


Supplemental Table 5. Results of ten fold cross-validation.

| Characteristics | fold1  HR [95%CI] | fold2  HR [95%CI] | fold3  HR [95%CI] | fold4  HR [95%CI] | fold5  HR [95%CI] | fold6  HR [95%CI] | fold7  HR [95%CI] | fold8  HR [95%CI] | fold9  HR [95%CI] | fold10  HR [95%CI] | Main analysis  HR [95%CI] | P value |
| --- | --- | --- | --- | --- | --- | --- | --- | --- | --- | --- | --- | --- |
| Moderately hard water | 1.03 [0.96, 1.10] | 1.04 [0.97, 1.11] | 1.05 [0.98, 1.12] | 1.03 [0.96, 1.11] | 1.05 [0.98, 1.13] | 1.06 [0.98, 1.13] | 1.04 [0.97, 1.11] | 1.06 [0.99, 1.14] | 1.05 [0.98, 1.12] | 1.03 [0.96, 1.10] | 1.04 [ 0.98 , 1.11 ] | 1.00 |
| Hard water | 0.83 [0.74, 0.94] | 0.88 [0.78, 0.99] | 0.86 [0.76, 0.97] | 0.85 [0.75, 0.96] | 0.85 [0.75, 0.96] | 0.85 [0.75, 0.97] | 0.86 [0.76, 0.97] | 0.87 [0.77, 0.98] | 0.84 [0.74, 0.95] | 0.87 [0.77, 0.98] | 0.86 [ 0.76 , 0.96 ] | 1.00 |
| Very hard water | 0.84 [0.79, 0.90] | 0.87 [0.81, 0.93] | 0.85 [0.80, 0.91] | 0.86 [0.80, 0.92] | 0.86 [0.80, 0.92] | 0.85 [0.79, 0.91] | 0.85 [0.79, 0.91] | 0.85 [0.79, 0.91] | 0.85 [0.80, 0.91] | 0.84 [0.79, 0.90] | 0.85 [ 0.8 , 0.91 ] | 0.92 |
| Sex Male | 0.93 [0.82, 1.07] | 0.92 [0.81, 1.06] | 0.95 [0.83, 1.09] | 0.96 [0.84, 1.10] | 0.94 [0.82, 1.08] | 0.97 [0.85, 1.12] | 0.95 [0.83, 1.09] | 0.92 [0.81, 1.06] | 0.94 [0.82, 1.08] | 0.91 [0.79, 1.04] | 0.91 [ 0.81 , 1.04 ] | 0.92 |
| PRS | 1.27 [1.24, 1.31] | 1.27 [1.23, 1.30] | 1.27 [1.23, 1.30] | 1.26 [1.23, 1.30] | 1.27 [1.24, 1.31] | 1.28 [1.24, 1.31] | 1.26 [1.22, 1.29] | 1.26 [1.23, 1.30] | 1.28 [1.24, 1.31] | 1.27 [1.24, 1.31] | 1.27 [ 1.24 , 1.31 ] | 1.00 |
| Age | 1.03 [1.03, 1.04] | 1.03 [1.03, 1.04] | 1.03 [1.03, 1.04] | 1.03 [1.03, 1.04] | 1.03 [1.03, 1.04] | 1.03 [1.03, 1.04] | 1.03 [1.03, 1.04] | 1.03 [1.03, 1.04] | 1.03 [1.03, 1.04] | 1.03 [1.03, 1.04] | 1.04 [ 1.03 , 1.04 ] | 0.95 |
| Cooked_vegetable | 1.00 [0.99, 1.02] | 1.01 [0.99, 1.02] | 1.01 [0.99, 1.02] | 1.01 [0.99, 1.02] | 1.01 [0.99, 1.02] | 1.01 [0.99, 1.02] | 1.01 [0.99, 1.02] | 1.01 [1.00, 1.02] | 1.01 [0.99, 1.02] | 1.01 [1.00, 1.03] | 1.01 [ 0.99 , 1.02 ] | 1.00 |
| Raw_vegetable | 1.00 [0.98, 1.01] | 1.00 [0.99, 1.01] | 1.00 [0.99, 1.01] | 1.00 [0.99, 1.01] | 1.00 [0.99, 1.02] | 1.00 [0.98, 1.01] | 0.99 [0.98, 1.01] | 1.00 [0.99, 1.02] | 1.00 [0.99, 1.02] | 1.00 [0.98, 1.01] | 1 [ 0.99 , 1.01 ] | 0.85 |
| Fresh_fruit | 1.00 [0.98, 1.01] | 0.99 [0.98, 1.01] | 1.00 [0.98, 1.02] | 1.00 [0.98, 1.02] | 1.00 [0.98, 1.02] | 1.00 [0.98, 1.02] | 1.00 [0.98, 1.01] | 1.00 [0.98, 1.01] | 1.00 [0.98, 1.02] | 1.00 [0.98, 1.01] | 1 [ 0.99 , 1.02 ] | 1.00 |
| Drief_fruit | 1.01 [0.99, 1.02] | 1.01 [0.99, 1.02] | 1.00 [0.99, 1.02] | 1.00 [0.99, 1.02] | 1.00 [0.99, 1.02] | 1.01 [0.99, 1.02] | 1.01 [0.99, 1.02] | 1.00 [0.99, 1.02] | 1.00 [0.99, 1.02] | 1.01 [0.99, 1.02] | 1.01 [ 0.99 , 1.02 ] | 1.00 |
| Oily_fish | 0.96 [0.93, 0.99] | 0.96 [0.93, 0.99] | 0.96 [0.93, 0.99] | 0.96 [0.93, 0.99] | 0.97 [0.94, 1.00] | 0.97 [0.94, 1.00] | 0.96 [0.93, 0.99] | 0.96 [0.93, 0.99] | 0.96 [0.93, 0.99] | 0.95 [0.92, 0.99] | 0.96 [ 0.94 , 0.99 ] | 0.92 |
| Non.oily_fish | 1.03 [0.99, 1.07] | 1.02 [0.98, 1.06] | 1.04 [1.00, 1.08] | 1.03 [0.99, 1.06] | 1.02 [0.98, 1.06] | 1.02 [0.98, 1.06] | 1.02 [0.98, 1.06] | 1.02 [0.99, 1.06] | 1.02 [0.98, 1.06] | 1.03 [0.99, 1.07] | 1.02 [ 0.99 , 1.06 ] | 0.77 |
| Processed_meat | 0.97 [0.94, 1.00] | 0.96 [0.94, 0.99] | 0.97 [0.94, 1.00] | 0.97 [0.95, 1.00] | 0.97 [0.94, 1.00] | 0.97 [0.94, 1.00] | 0.97 [0.94, 1.00] | 0.96 [0.94, 0.99] | 0.97 [0.94, 1.00] | 0.97 [0.94, 1.00] | 0.97 [ 0.94 , 1 ] | 1.00 |
| Poultry | 1.02 [0.99, 1.06] | 1.03 [0.99, 1.06] | 1.03 [0.99, 1.06] | 1.01 [0.98, 1.05] | 1.00 [0.97, 1.04] | 1.02 [0.98, 1.05] | 1.03 [1.00, 1.06] | 1.02 [0.99, 1.05] | 1.02 [0.99, 1.05] | 1.01 [0.98, 1.04] | 1.02 [ 0.98 , 1.05 ] | 0.92 |
| Beef | 0.99 [0.96, 1.03] | 0.98 [0.95, 1.01] | 0.99 [0.95, 1.02] | 0.99 [0.96, 1.03] | 0.99 [0.95, 1.02] | 0.98 [0.95, 1.02] | 0.99 [0.96, 1.03] | 0.99 [0.96, 1.03] | 0.99 [0.96, 1.03] | 0.99 [0.96, 1.03] | 0.99 [ 0.96 , 1.03 ] | 0.92 |
| Pork | 1.00 [0.96, 1.04] | 1.02 [0.98, 1.06] | 1.02 [0.98, 1.07] | 1.01 [0.97, 1.05] | 1.00 [0.96, 1.05] | 1.01 [0.97, 1.05] | 1.01 [0.97, 1.05] | 1.01 [0.97, 1.06] | 1.02 [0.98, 1.06] | 1.02 [0.98, 1.06] | 1.01 [ 0.97 , 1.05 ] | 1.00 |
| Cheese | 0.96 [0.93, 0.98] | 0.96 [0.93, 0.98] | 0.96 [0.94, 0.99] | 0.96 [0.93, 0.98] | 0.96 [0.94, 0.98] | 0.96 [0.94, 0.99] | 0.96 [0.94, 0.98] | 0.96 [0.93, 0.98] | 0.96 [0.93, 0.98] | 0.96 [0.93, 0.98] | 0.96 [ 0.93 , 0.98 ] | 0.61 |
| Cereal | 0.99 [0.98, 1.00] | 0.99 [0.98, 1.00] | 0.99 [0.98, 1.00] | 0.99 [0.98, 1.00] | 0.99 [0.98, 1.00] | 0.99 [0.98, 1.00] | 0.99 [0.98, 1.00] | 0.99 [0.98, 1.00] | 0.99 [0.98, 1.00] | 0.99 [0.98, 1.00] | 0.99 [ 0.98 , 1 ] | 1.00 |
| Water_intake | 1.01 [1.00, 1.02] | 1.01 [0.99, 1.02] | 1.01 [1.00, 1.03] | 1.01 [1.00, 1.02] | 1.01 [1.00, 1.03] | 1.01 [1.00, 1.02] | 1.01 [1.00, 1.02] | 1.01 [1.00, 1.03] | 1.01 [1.00, 1.03] | 1.02 [1.00, 1.03] | 1.01 [ 1 , 1.03 ] | 1.00 |
| Smoking_status Previous | 1.38 [1.30, 1.46] | 1.33 [1.25, 1.41] | 1.35 [1.27, 1.44] | 1.39 [1.30, 1.47] | 1.30 [1.22, 1.38] | 1.36 [1.28, 1.45] | 1.36 [1.28, 1.44] | 1.37 [1.29, 1.45] | 1.34 [1.26, 1.42] | 1.34 [1.26, 1.42] | 1.35 [ 1.28 , 1.43 ] | 0.85 |
| Smoking_status Current | 1.67 [1.53, 1.83] | 1.69 [1.55, 1.85] | 1.68 [1.54, 1.83] | 1.69 [1.55, 1.85] | 1.64 [1.50, 1.79] | 1.66 [1.52, 1.82] | 1.68 [1.54, 1.84] | 1.70 [1.56, 1.85] | 1.69 [1.55, 1.84] | 1.65 [1.51, 1.80] | 1.67 [ 1.53 , 1.81 ] | 0.85 |
| Alcohol_status Previous | 0.97 [0.82, 1.14] | 1.02 [0.87, 1.20] | 0.99 [0.84, 1.16] | 0.92 [0.78, 1.08] | 0.98 [0.83, 1.15] | 0.98 [0.84, 1.16] | 1.01 [0.86, 1.18] | 0.94 [0.80, 1.11] | 0.95 [0.81, 1.12] | 0.96 [0.81, 1.12] | 0.99 [ 0.85 , 1.15 ] | 1.00 |
| Alcohol_status Current | 0.81 [0.72, 0.92] | 0.83 [0.74, 0.93] | 0.82 [0.73, 0.92] | 0.80 [0.71, 0.90] | 0.81 [0.72, 0.91] | 0.81 [0.72, 0.91] | 0.82 [0.73, 0.93] | 0.78 [0.70, 0.88] | 0.81 [0.72, 0.91] | 0.79 [0.71, 0.89] | 0.81 [ 0.72 , 0.9 ] | 0.92 |
| walked10minutes | 1.02 [1.00, 1.04] | 1.02 [1.01, 1.04] | 1.02 [1.00, 1.03] | 1.02 [1.00, 1.04] | 1.02 [1.00, 1.04] | 1.02 [1.00, 1.03] | 1.02 [1.01, 1.04] | 1.02 [1.00, 1.03] | 1.02 [1.00, 1.03] | 1.02 [1.01, 1.04] | 1.02 [ 1 , 1.03 ] | 0.92 |
| moderate_physical_activity | 1.02 [1.00, 1.03] | 1.02 [1.00, 1.03] | 1.02 [1.00, 1.03] | 1.01 [1.00, 1.03] | 1.01 [1.00, 1.03] | 1.01 [1.00, 1.03] | 1.02 [1.00, 1.03] | 1.01 [1.00, 1.03] | 1.01 [1.00, 1.03] | 1.01 [1.00, 1.03] | 1.01 [ 1 , 1.03 ] | 0.92 |
| vigorous_physical_activity | 0.99 [0.97, 1.00] | 0.99 [0.98, 1.01] | 0.99 [0.98, 1.01] | 0.99 [0.98, 1.01] | 0.99 [0.97, 1.00] | 0.99 [0.98, 1.01] | 1.00 [0.98, 1.01] | 1.00 [0.98, 1.01] | 0.99 [0.98, 1.01] | 0.99 [0.97, 1.00] | 0.99 [ 0.98 , 1.01 ] | 1.00 |
| stair_climbing | 0.95 [0.93, 0.97] | 0.95 [0.93, 0.97] | 0.94 [0.92, 0.96] | 0.94 [0.92, 0.97] | 0.95 [0.93, 0.97] | 0.95 [0.93, 0.97] | 0.95 [0.93, 0.97] | 0.95 [0.93, 0.97] | 0.95 [0.93, 0.97] | 0.95 [0.93, 0.97] | 0.95 [ 0.93 , 0.97 ] | 0.88 |
| time_watingTV | 1.06 [1.04, 1.07] | 1.06 [1.05, 1.08] | 1.06 [1.04, 1.07] | 1.06 [1.04, 1.07] | 1.06 [1.04, 1.07] | 1.05 [1.04, 1.07] | 1.06 [1.04, 1.08] | 1.06 [1.04, 1.08] | 1.06 [1.04, 1.07] | 1.06 [1.04, 1.08] | 1.06 [ 1.04 , 1.07 ] | 1.00 |
| time_usingComputer | 1.00 [0.98, 1.02] | 0.98 [0.97, 1.00] | 0.99 [0.97, 1.01] | 1.00 [0.98, 1.02] | 0.99 [0.98, 1.01] | 0.98 [0.97, 1.00] | 0.99 [0.97, 1.01] | 0.99 [0.97, 1.01] | 0.99 [0.97, 1.01] | 0.99 [0.97, 1.01] | 0.99 [ 0.97 , 1.01 ] | 1.00 |
| Time_driving | 1.01 [0.99, 1.03] | 1.01 [0.99, 1.03] | 1.01 [0.99, 1.03] | 1.01 [0.99, 1.03] | 1.01 [0.99, 1.03] | 1.01 [0.99, 1.03] | 1.01 [0.99, 1.03] | 1.01 [0.99, 1.03] | 1.00 [0.98, 1.03] | 1.01 [0.99, 1.03] | 1.01 [ 0.99 , 1.03 ] | 0.85 |
| Types_physical_activity | 1.03 [1.00, 1.06] | 1.03 [1.00, 1.06] | 1.03 [1.00, 1.06] | 1.03 [1.00, 1.06] | 1.03 [1.00, 1.06] | 1.02 [1.00, 1.05] | 1.02 [0.99, 1.04] | 1.02 [1.00, 1.05] | 1.02 [1.00, 1.05] | 1.03 [1.00, 1.06] | 1.03 [ 1 , 1.05 ] | 0.72 |
| hand_grip | 0.95 [0.95, 0.96] | 0.95 [0.95, 0.96] | 0.95 [0.95, 0.96] | 0.95 [0.95, 0.96] | 0.95 [0.95, 0.96] | 0.95 [0.95, 0.96] | 0.95 [0.95, 0.96] | 0.96 [0.95, 0.96] | 0.95 [0.95, 0.96] | 0.95 [0.95, 0.96] | 0.95 [ 0.95 , 0.96 ] | 0.84 |
| SBP | 1.00 [1.00, 1.00] | 1.00 [1.00, 1.00] | 1.00 [1.00, 1.00] | 1.00 [1.00, 1.00] | 1.00 [1.00, 1.00] | 1.00 [1.00, 1.00] | 1.00 [1.00, 1.00] | 1.00 [1.00, 1.00] | 1.00 [1.00, 1.00] | 1.00 [1.00, 1.00] | 1 [ 1 , 1 ] | 0.51 |
| DBP | 1.00 [0.99, 1.00] | 1.00 [0.99, 1.00] | 1.00 [0.99, 1.00] | 1.00 [0.99, 1.00] | 1.00 [0.99, 1.00] | 1.00 [0.99, 1.00] | 1.00 [0.99, 1.00] | 1.00 [0.99, 1.00] | 1.00 [0.99, 1.00] | 1.00 [0.99, 1.00] | 1 [ 0.99 , 1 ] | 0.80 |
| Pause_rate | 1.01 [1.00, 1.01] | 1.01 [1.00, 1.01] | 1.01 [1.00, 1.01] | 1.01 [1.00, 1.01] | 1.01 [1.00, 1.01] | 1.01 [1.00, 1.01] | 1.01 [1.00, 1.01] | 1.01 [1.00, 1.01] | 1.01 [1.00, 1.01] | 1.01 [1.00, 1.01] | 1.01 [ 1 , 1.01 ] | 0.55 |
| metabolic_rate | 1.01 [1.01, 1.02] | 1.01 [1.01, 1.02] | 1.01 [1.01, 1.02] | 1.01 [1.01, 1.02] | 1.01 [1.01, 1.02] | 1.01 [1.01, 1.02] | 1.01 [1.01, 1.02] | 1.01 [1.01, 1.02] | 1.01 [1.01, 1.02] | 1.01 [1.01, 1.02] | 1.01 [ 1.01 , 1.02 ] | 0.95 |
| body_fat_percentage | 1.00 [1.00, 1.00] | 1.00 [1.00, 1.00] | 1.00 [1.00, 1.00] | 1.00 [1.00, 1.00] | 1.00 [1.00, 1.00] | 1.00 [1.00, 1.00] | 1.00 [1.00, 1.00] | 1.00 [1.00, 1.00] | 1.00 [1.00, 1.00] | 1.00 [1.00, 1.00] | 1 [ 1 , 1 ] | NaN |
| `genotyping batch` | 1.00 [1.00, 1.00] | 1.00 [1.00, 1.00] | 1.00 [1.00, 1.00] | 1.00 [1.00, 1.00] | 1.00 [1.00, 1.00] | 1.00 [1.00, 1.00] | 1.00 [1.00, 1.00] | 1.00 [1.00, 1.00] | 1.00 [1.00, 1.00] | 1.00 [1.00, 1.00] | 1 [ 1 , 1 ] | 0.44 |
| `Genetic PCA1` | 1.00 [1.00, 1.00] | 1.00 [1.00, 1.00] | 1.00 [1.00, 1.00] | 1.00 [1.00, 1.00] | 1.00 [1.00, 1.00] | 1.00 [1.00, 1.00] | 1.00 [1.00, 1.00] | 1.00 [1.00, 1.00] | 1.00 [1.00, 1.00] | 1.00 [1.00, 1.00] | 1 [ 1 , 1 ] | 0.28 |
| `Genetic PCA2` | 1.00 [1.00, 1.00] | 1.00 [1.00, 1.00] | 1.00 [1.00, 1.00] | 1.00 [1.00, 1.00] | 1.00 [1.00, 1.00] | 1.00 [1.00, 1.00] | 1.00 [1.00, 1.00] | 1.00 [1.00, 1.00] | 1.00 [1.00, 1.00] | 1.00 [1.00, 1.00] | 1 [ 1 , 1 ] | 0.93 |
| `Genetic PCA3` | 1.00 [1.00, 1.00] | 1.00 [1.00, 1.00] | 1.00 [1.00, 1.00] | 1.00 [1.00, 1.01] | 1.00 [1.00, 1.00] | 1.00 [1.00, 1.00] | 1.00 [1.00, 1.01] | 1.00 [1.00, 1.00] | 1.00 [1.00, 1.00] | 1.00 [1.00, 1.00] | 1 [ 1 , 1 ] | 0.57 |
| `Genetic PCA4` | 1.00 [1.00, 1.00] | 1.00 [1.00, 1.00] | 1.00 [1.00, 1.00] | 1.00 [1.00, 1.00] | 1.00 [1.00, 1.00] | 1.00 [1.00, 1.00] | 1.00 [1.00, 1.00] | 1.00 [1.00, 1.01] | 1.00 [1.00, 1.00] | 1.00 [1.00, 1.00] | 1 [ 1 , 1 ] | 0.86 |
| `Genetic PCA5` | 0.99 [0.99, 1.00] | 0.99 [0.99, 1.00] | 0.99 [0.99, 1.00] | 0.99 [0.99, 0.99] | 0.99 [0.99, 0.99] | 0.99 [0.99, 0.99] | 0.99 [0.99, 0.99] | 0.99 [0.99, 1.00] | 0.99 [0.99, 0.99] | 0.99 [0.99, 1.00] | 0.99 [ 0.99 , 0.99 ] | 0.68 |
| `Genetic PCA6` | 1.00 [0.99, 1.00] | 1.00 [1.00, 1.01] | 1.00 [1.00, 1.01] | 1.00 [1.00, 1.01] | 1.00 [1.00, 1.01] | 1.00 [1.00, 1.01] | 1.00 [1.00, 1.01] | 1.00 [1.00, 1.01] | 1.00 [1.00, 1.01] | 1.00 [1.00, 1.01] | 1 [ 1 , 1.01 ] | 0.28 |
| `Genetic PCA7` | 1.00 [0.99, 1.01] | 1.00 [0.99, 1.00] | 1.00 [0.99, 1.01] | 1.00 [0.99, 1.01] | 1.00 [0.99, 1.01] | 1.00 [0.99, 1.01] | 1.00 [0.99, 1.01] | 1.00 [1.00, 1.01] | 1.00 [0.99, 1.01] | 1.00 [0.99, 1.00] | 1 [ 0.99 , 1.01 ] | 0.72 |
| `Genetic PCA8` | 1.00 [0.99, 1.01] | 1.00 [0.99, 1.01] | 1.00 [0.99, 1.01] | 1.00 [0.99, 1.00] | 1.00 [0.99, 1.01] | 1.00 [0.99, 1.01] | 1.00 [0.99, 1.00] | 1.00 [0.99, 1.00] | 1.00 [0.99, 1.01] | 1.00 [0.99, 1.00] | 1 [ 0.99 , 1 ] | 0.76 |
| `Genetic PCA9` | 1.00 [1.00, 1.01] | 1.01 [1.00, 1.01] | 1.01 [1.00, 1.01] | 1.01 [1.00, 1.01] | 1.00 [1.00, 1.01] | 1.00 [1.00, 1.01] | 1.01 [1.00, 1.01] | 1.01 [1.00, 1.01] | 1.01 [1.00, 1.01] | 1.00 [1.00, 1.01] | 1 [ 1 , 1.01 ] | 1.00 |
| `Genetic PCA10` | 1.00 [1.00, 1.01] | 1.00 [1.00, 1.01] | 1.00 [1.00, 1.01] | 1.00 [1.00, 1.01] | 1.00 [1.00, 1.01] | 1.00 [1.00, 1.01] | 1.00 [1.00, 1.01] | 1.00 [1.00, 1.01] | 1.00 [1.00, 1.01] | 1.00 [1.00, 1.01] | 1 [ 1 , 1.01 ] | 0.91 |
